# Supplementary material for: Cytotoxicity Evaluation of Photosensitizer-Conjugated Hexagonal Upconverting Nanoparticles
Source: MDPI journal article supplement (doi:10.3390/nano13091535), 2023-05-03
Supplement: s1 [file s1]

## Supplementary Material

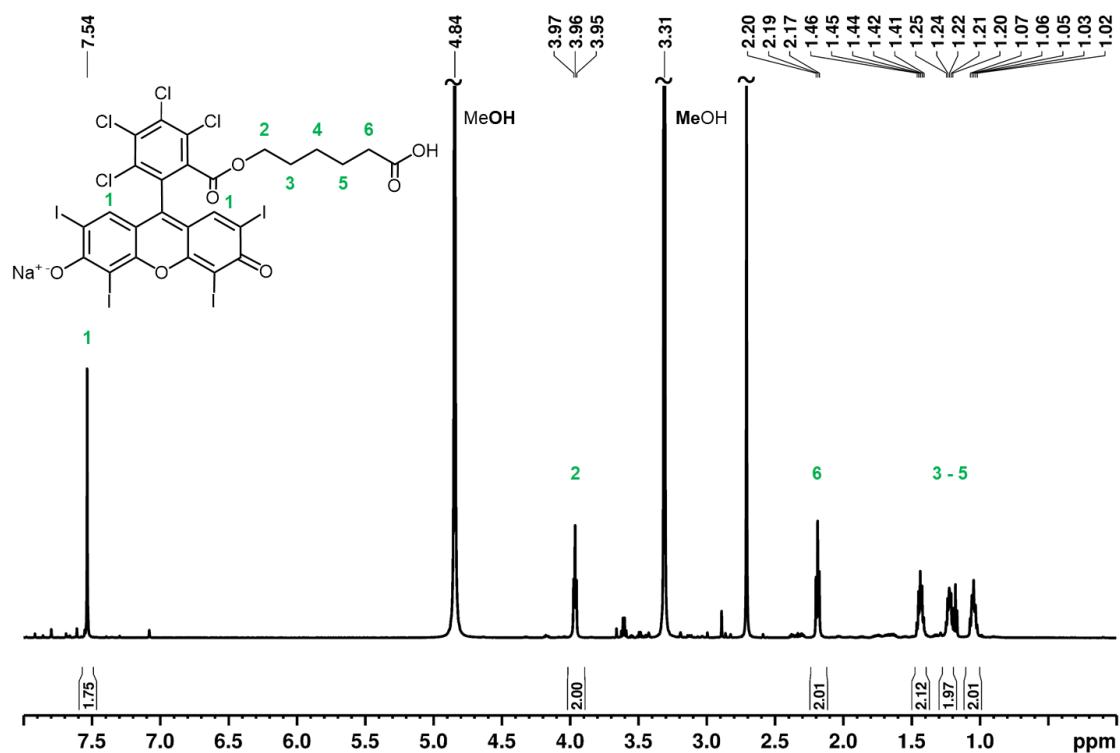

**Figure S1.** High-resolution  $^1\text{H}$  NMR spectrum of RB-CPC in deuterated methanol at 25 °C.
